# Supplementary material
Source: PubMed Central journal article supplement (PMC6535134)
Supplement: NIHMS1512697-supplement-1.pdf [file NIHMS1512697-supplement-1.pdf]

Supplemental Table 1. Bivariate Spearman Correlations Between the Pittsburgh Sleep Quality Index Component Scores and NSSI Engagement ( $n=324$ )

|                       | 1     | 2     | 3     | 4     | 5     | 6     | 7     | 8   |
|-----------------------|-------|-------|-------|-------|-------|-------|-------|-----|
| 1. NSSI               | 1.0   |       |       |       |       |       |       |     |
| 2.Sleep Quality       | 0.15* | 1.0   |       |       |       |       |       |     |
| 3.Sleep Latency       | 0.27* | 0.46* | 1.0   |       |       |       |       |     |
| 4.Sleep Duration      | 0.07  | 0.34* | 0.24* | 1.0   |       |       |       |     |
| 5.Sleep Efficiency    | 0.09  | 0.21* | 0.26* | 0.48* | 1.0   |       |       |     |
| 6.Sleep Disturbances  | 0.20* | 0.39* | 0.40* | 0.19* | 0.21* | 1.0   |       |     |
| 7.Sleep Medications   | 0.21* | 0.21* | 0.26* | 0.09  | 0.10  | 0.19* | 1.0   |     |
| 8.Daytime Dysfunction | 0.18* | 0.43* | 0.37* | 0.24* | 0.16* | 0.37* | 0.16* | 1.0 |

\*  $p < .01$
